# Supplementary material for: Technical note: Gas-phase nitrate radical generation via irradiation of aerated ceric ammonium nitrate mixtures
Source: Copernicus journal article supplement (doi:10.5194/egusphere-2023-1554), 2023-07-21
Supplement: Supplementary file 1 [file egusphere-2023-1554-supplement.pdf]

# Supplement to Technical note: Gas-phase nitrate radical generation via irradiation of aerated ceric ammonium nitrate mixtures

Andrew T. Lambe<sup>1</sup>, Bin Bai<sup>2</sup>, Masayuki Takeuchi<sup>3</sup>, Nicole Orwat<sup>4</sup>, Paul M. Zimmerman<sup>4</sup>, Mitchell W. Alton<sup>1</sup>, Nga L. Ng<sup>2,3,5</sup>, Andrew Freedman<sup>1</sup>, Megan S. Clafin<sup>1</sup>, Drew R. Gentner<sup>6,7</sup>, Douglas R. Worsnop<sup>1</sup>, and Pengfei Liu<sup>2</sup>

<sup>1</sup>Aerodyne Research, Inc., Billerica, MA, USA

<sup>2</sup>School of Earth and Atmospheric Sciences, Georgia Institute of Technology, Atlanta, GA, USA

<sup>3</sup>School of Civil and Environmental Engineering, Georgia Institute of Technology, Atlanta, GA, USA

<sup>4</sup>Department of Chemistry, University of Michigan, Ann Arbor, MI, USA

<sup>5</sup>School of Chemical and Biomolecular Engineering, Georgia Institute of Technology, Atlanta, GA, USA

<sup>6</sup>Department of Chemical and Environmental Engineering, Yale University, New Haven, CT, USA

<sup>7</sup>School of the Environment, Yale University, New Haven, CT, USA

**Correspondence:** Andrew T. Lambe (lambe@aerodyne.com)

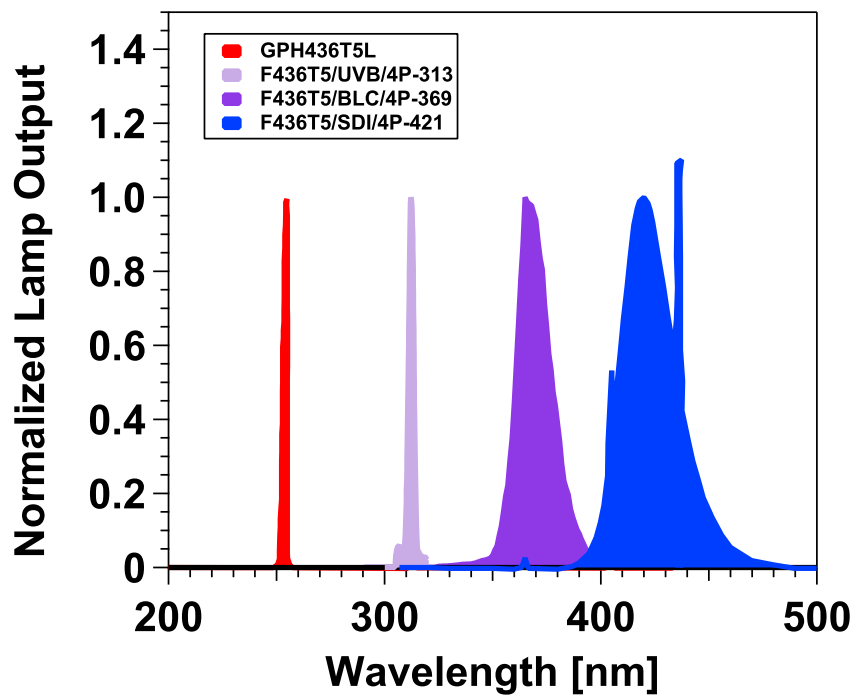

**Figure S1.** Normalized emission spectra for low-pressure GPH436T5L/4P, F436T5/UVB/4P-313, F436T5/BLC/4P-369, and F436T5/SDI/4P-421 mercury lamps used in this study. Spectra are provided by the manufacturer (GPH436T5L/4P: Light Sources Inc.; all others: LCD Lighting, Inc.)

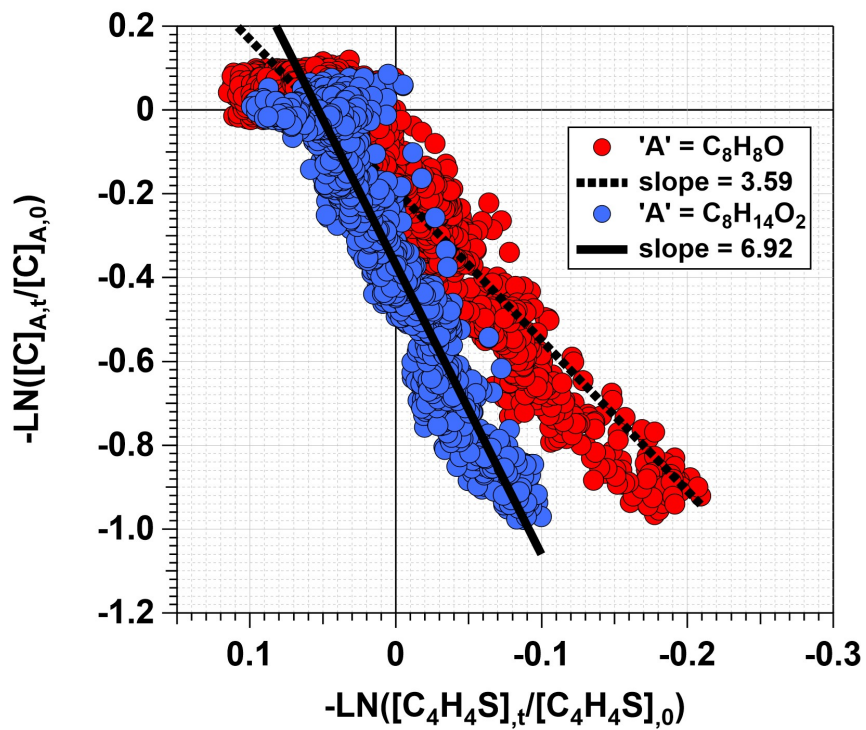

**Figure S2.** Relative rate coefficients obtained from Vocus measurements of acetonitrile, thiophene (C<sub>4</sub>H<sub>4</sub>S), 2,3-dibenzofuran (C<sub>8</sub>H<sub>8</sub>O), and cis-3-hexynyl-acetate (C<sub>8</sub>H<sub>14</sub>O<sub>2</sub>) tracers used in characterization studies described in Sect. 3.2. Literature relative rate coefficients obtained from kinetic data published by Atkinson (1991) and Atkinson et al. (1995).

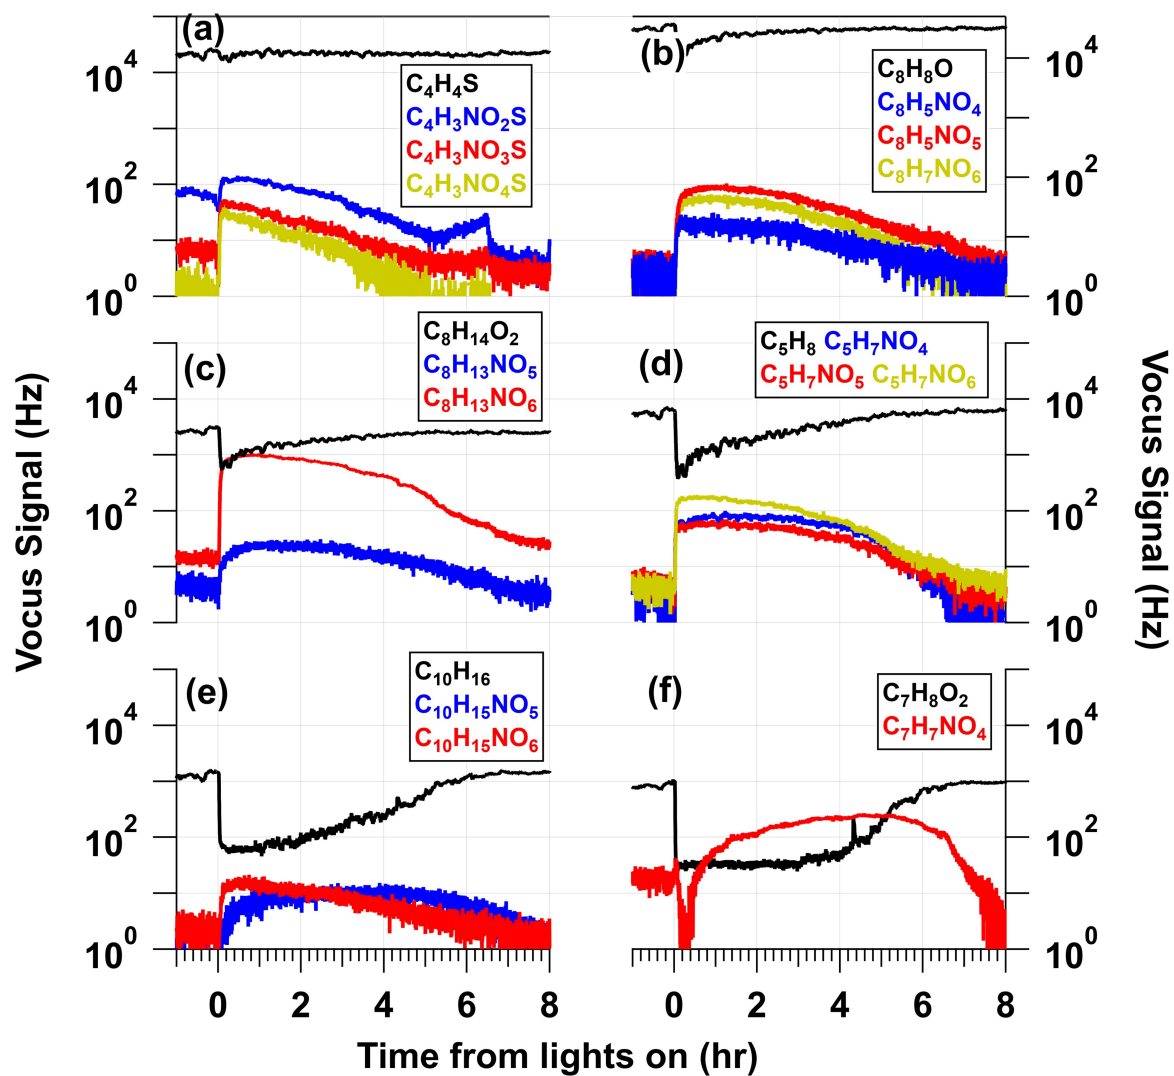

**Figure S3.** Time series of Vocus PTR ions measured following irradiation of a mixture containing 0.5 M CAN and 6.0 M HNO<sub>3</sub> mixture: (a) thiophene (C<sub>4</sub>H<sub>4</sub>S) and nitrothiophenes (C<sub>4</sub>H<sub>3</sub>NO<sub>2-4</sub>S), (b) 2,3-dibenzofuran (C<sub>8</sub>H<sub>8</sub>O) and C<sub>8</sub>H<sub>5,7</sub>NO<sub>4-6</sub>, (c) cis-3-hexynyl-acetate (C<sub>8</sub>H<sub>14</sub>O<sub>2</sub>) and C<sub>8</sub>H<sub>13</sub>NO<sub>5-6</sub>, (d) isoprene C<sub>5</sub>H<sub>8</sub> and C<sub>5</sub>H<sub>7</sub>NO<sub>4-6</sub>, (e) α-pinene (C<sub>10</sub>H<sub>16</sub>) and C<sub>10</sub>H<sub>15</sub>NO<sub>5,6</sub>, and (f) guaiacol C<sub>7</sub>H<sub>8</sub>O<sub>2</sub> and nitroguaiacol (C<sub>7</sub>H<sub>7</sub>NO<sub>4</sub>).

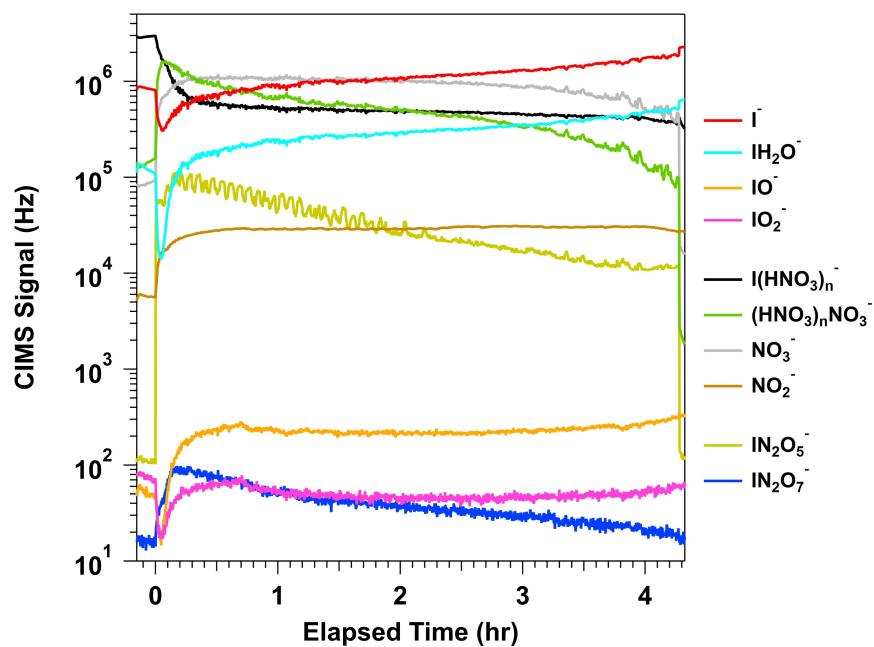

**Figure S4.** HR-ToF-CIMS time series of  $I^-$ ,  $IH_2O^-$ ,  $IO^-$ ,  $IO_2^-$ ,  $NO_2^-$ ,  $NO_3^-$ ,  $I(HNO_3)_n^-$ , and  $(HNO_3)_nNO_3^-$ ,  $IN_2O_5^-$ , and  $IN_2O_7^-$  signals detected following irradiation of a mixture containing 0.5 M CAN and 1.0 M  $NaNO_3$  (see Fig. 7).

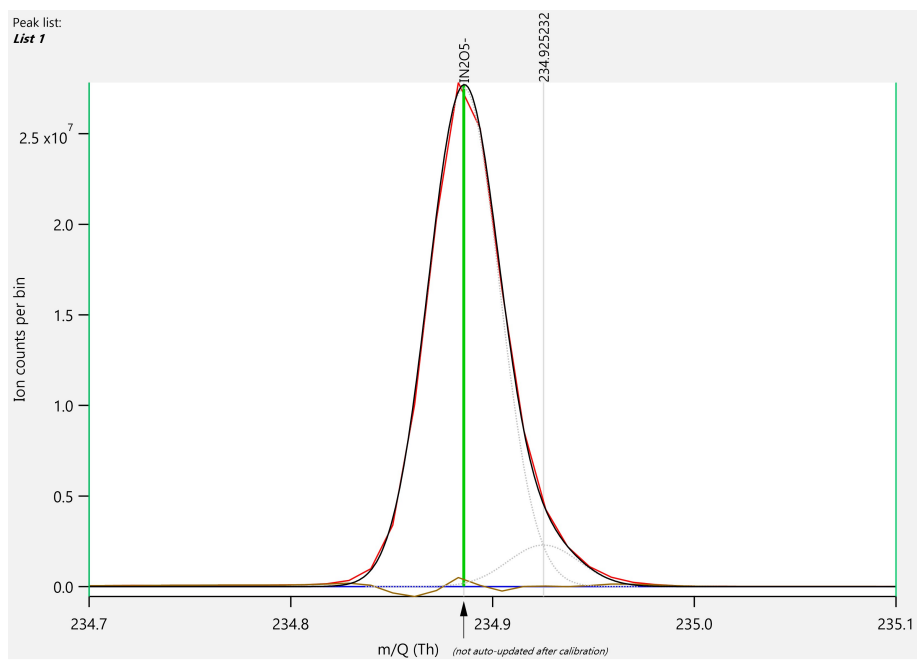

**Figure S5.** HR-ToF-CIMS spectrum of  $m/Q=235$  obtained following irradiation of CAN/HNO<sub>3</sub> mixtures.

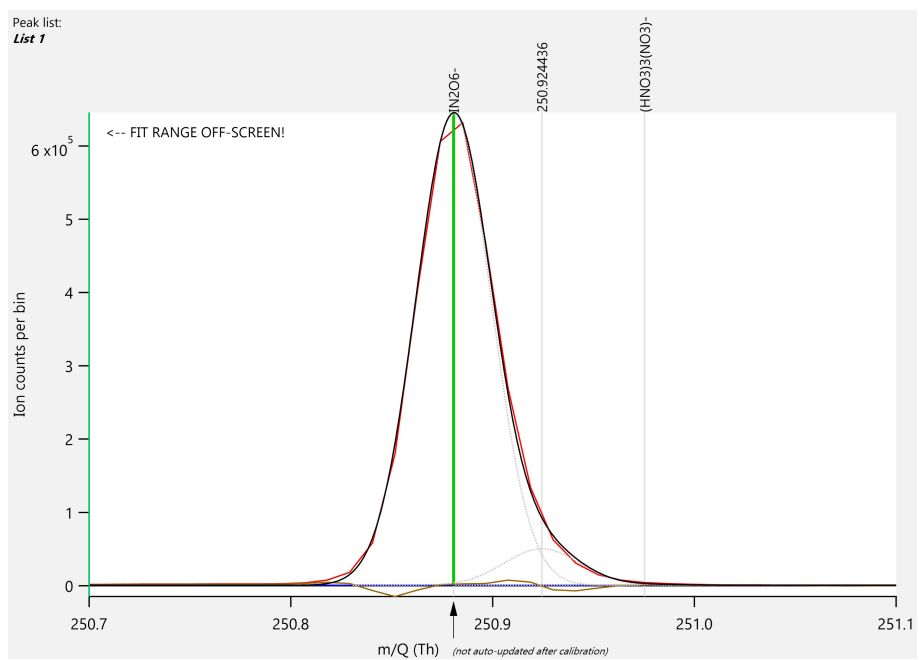

**Figure S6.** HR-ToF-CIMS spectrum of  $m/Q=251$  obtained following irradiation of CAN/HNO<sub>3</sub> mixtures.

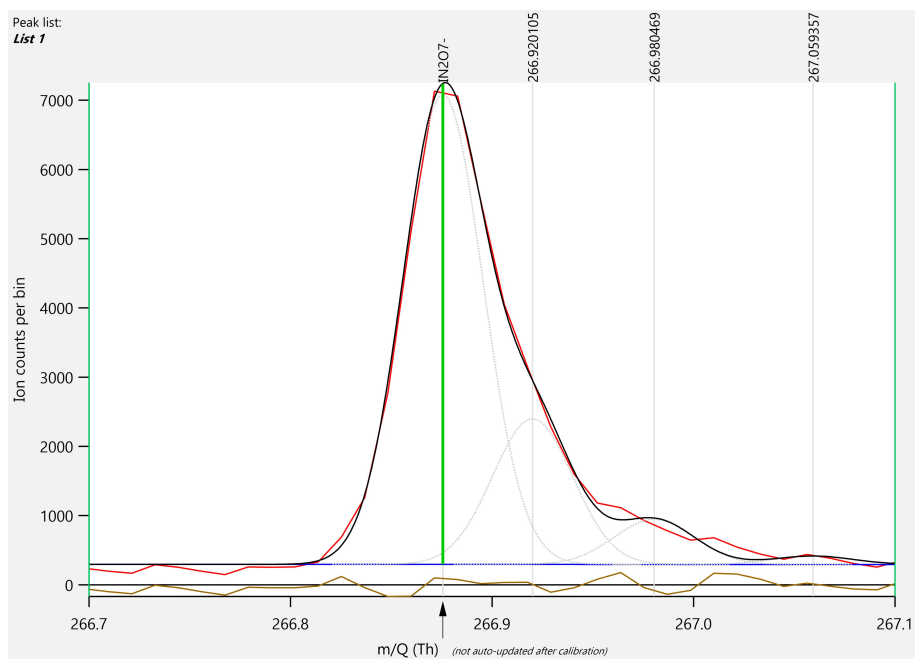

**Figure S7.** HR-ToF-CIMS spectrum of  $m/Q=267$  obtained following irradiation of CAN/HNO<sub>3</sub> mixtures.



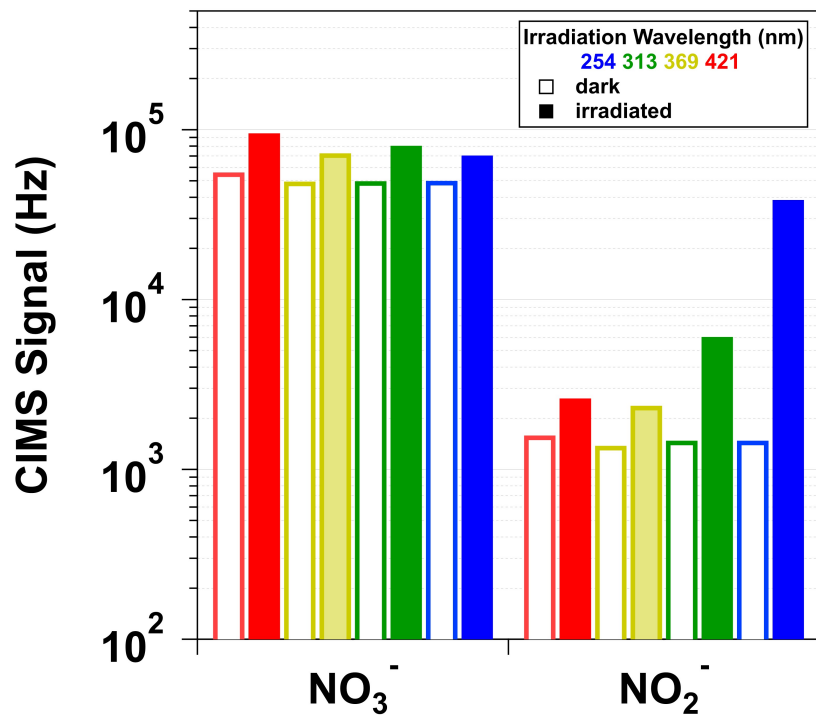

**Figure S8.** HR-ToF-CIMS NO<sub>2</sub><sup>-</sup> and NO<sub>3</sub><sup>-</sup> signals obtained during sampling of dark and irradiated neat CAN samples.

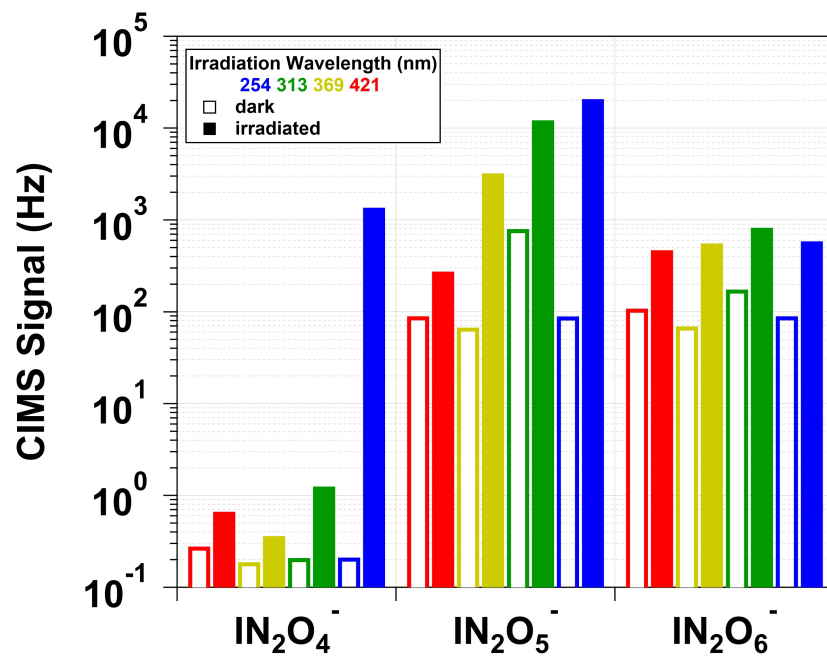

**Figure S9.** HR-ToF-CIMS IN<sub>2</sub>O<sub>4</sub><sup>-</sup>, IN<sub>2</sub>O<sub>5</sub><sup>-</sup>, and IN<sub>2</sub>O<sub>6</sub><sup>-</sup> signals obtained during sampling of dark and irradiated neat CAN samples.

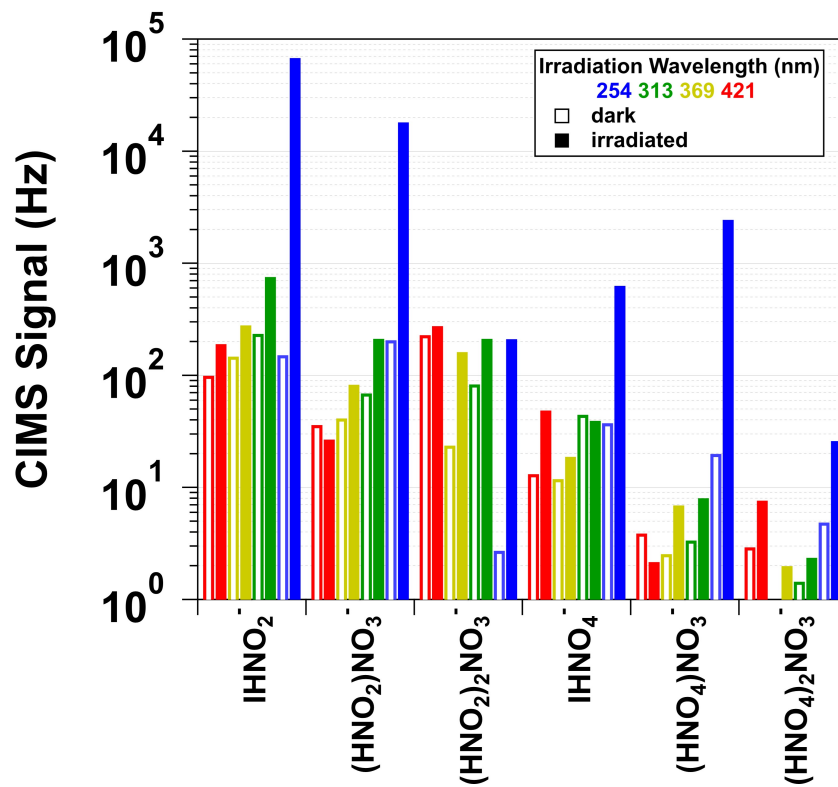

**Figure S10.** HR-ToF-CIMS I(HNO<sub>2</sub>)<sub>n</sub><sup>-</sup>, (HNO<sub>2</sub>)<sub>n</sub>NO<sub>3</sub><sup>-</sup>, I(HNO<sub>4</sub>)<sub>n</sub><sup>-</sup>, and (HNO<sub>4</sub>)<sub>n</sub>NO<sub>3</sub><sup>-</sup> signals obtained during sampling of dark and irradiated neat CAN samples.

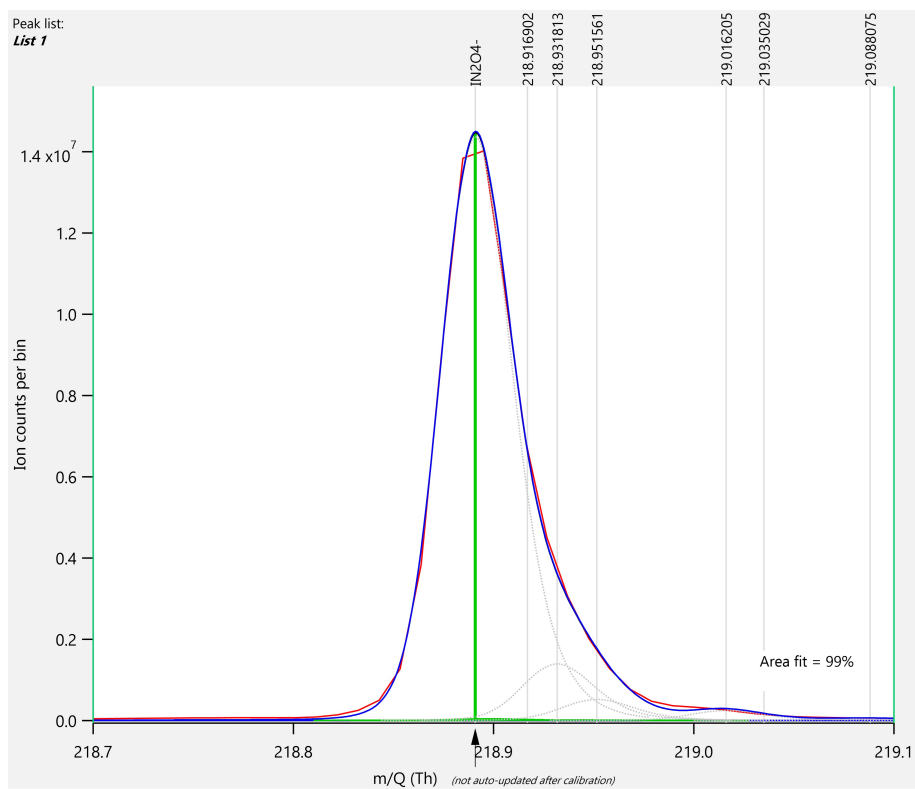

**Figure S11.** HR-ToF-CIMS spectrum of  $m/Q=219$  obtained following irradiation of neat CAN samples.

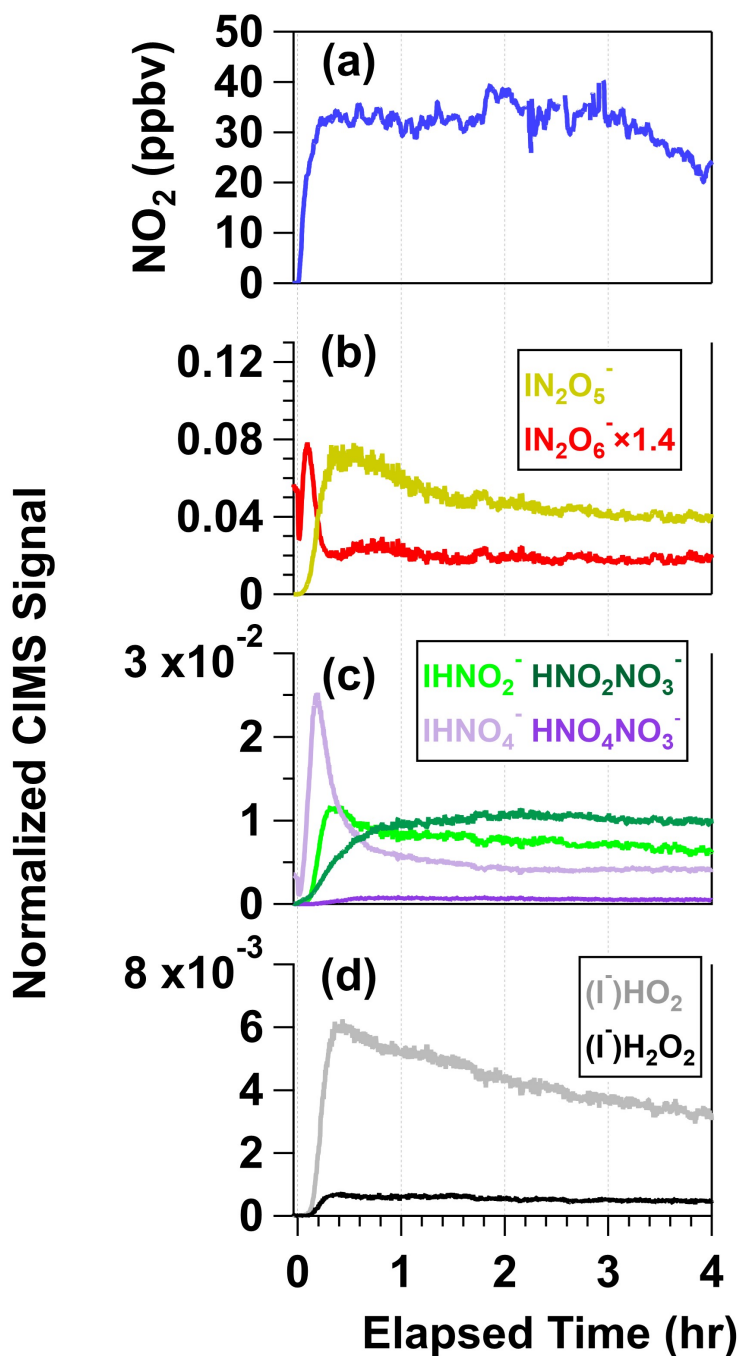

**Figure S12.** Time series of (a)  $\text{NO}_2$ , (b)  $\text{N}_2\text{O}_5$  and  $\text{N}_2\text{O}_6$ , (c)  $\text{HNO}_2$  and  $\text{HNO}_4$ , and (d)  $\text{HO}_2$  and  $\text{H}_2\text{O}_2$  measured with  $\text{NO}_x$  analyzer and HR-ToF-CIMS during irradiation of a mixture containing 0.5 M CAN and 3.0 M  $\text{HNO}_3$ .  $\text{N}_2\text{O}_5$ ,  $\text{N}_2\text{O}_6$ ,  $\text{HO}_2$  and  $\text{H}_2\text{O}_2$  were detected as  $\text{I}^-$  adducts, and  $\text{HNO}_2$  and  $\text{HNO}_4$  were detected as both  $\text{I}^-$  and  $\text{NO}_3^-$  adducts.

Table S1: KinSim mechanism used to calculate concentrations of species associated with irradiation of CAN/HNO<sub>3</sub> mixtures. Rate coefficients or absorption cross sections are given in units of cm<sup>3</sup> molecules<sup>-1</sup> s<sup>-1</sup> (blue text), M<sup>-1</sup> s<sup>-1</sup> (red text), cm<sup>-2</sup> (teal text), or s<sup>-1</sup> (black text). Condensed-phase reaction rate coefficients were used where possible, and otherwise were obtained from gas-phase reaction rate coefficients. Reaction rate coefficients in parentheses were obtained by applying a 6.022E+020 conversion factor to the other reaction coefficient listed in the same row. Additional table notes: <sup>1</sup>[HNO<sub>3</sub>]=1.0 M, <sup>2</sup>[HNO<sub>3</sub>]=3.0 M, <sup>3</sup>[HNO<sub>3</sub>]=6.0 M.

| Reactant 1                                    | Reactant 2        | Product 1                                     | Product 2                    | Product 3 | RateCoeff           | Citation                               |
|-----------------------------------------------|-------------------|-----------------------------------------------|------------------------------|-----------|---------------------|----------------------------------------|
| Ce <sup>IV</sup> NO <sub>3</sub> <sup>-</sup> | hν <sub>254</sub> | [Ce <sup>III</sup> ...NO <sub>3</sub> ]*      | NO <sub>3</sub>              |           | 2.7E-17             | this work <sup>1</sup>                 |
|                                               |                   |                                               |                              |           | 3.1E-17             | this work <sup>2</sup>                 |
|                                               |                   |                                               |                              |           | 3.1E-17             | this work <sup>3</sup>                 |
| Ce <sup>IV</sup> NO <sub>3</sub> <sup>-</sup> | hν <sub>313</sub> | [Ce <sup>III</sup> ...NO <sub>3</sub> ]*      | NO <sub>3</sub>              |           | 3.1E-17             | this work <sup>1</sup>                 |
|                                               |                   |                                               |                              |           | 3.5E-17             | this work <sup>2</sup>                 |
|                                               |                   |                                               |                              |           | 4.5E-17             | this work <sup>3</sup>                 |
| Ce <sup>IV</sup> NO <sub>3</sub> <sup>-</sup> | hν <sub>369</sub> | [Ce <sup>III</sup> ...NO <sub>3</sub> ]*      | NO <sub>3</sub>              |           | 8.7E-18             | this work <sup>1</sup>                 |
|                                               |                   |                                               |                              |           | 1.2E-17             | this work <sup>2</sup>                 |
|                                               |                   |                                               |                              |           | 2.5E-17             | this work <sup>3</sup>                 |
| Ce <sup>IV</sup> NO <sub>3</sub> <sup>-</sup> | hν <sub>421</sub> | [Ce <sup>III</sup> ...NO <sub>3</sub> ]*      | NO <sub>3</sub>              |           | 1.0E-18             | this work <sup>1</sup>                 |
|                                               |                   |                                               |                              |           | 1.5E-18             | this work <sup>2</sup>                 |
|                                               |                   |                                               |                              |           | 4.4E-18             | this work <sup>3</sup>                 |
| [Ce <sup>III</sup> ...NO <sub>3</sub> ]*      |                   | Ce <sup>IV</sup> NO <sub>3</sub> <sup>-</sup> |                              |           | 5.12E+04            | Martin and Stevens (1978) <sup>1</sup> |
|                                               |                   |                                               |                              |           | 6.30E+03            | Martin and Stevens (1978) <sup>2</sup> |
|                                               |                   |                                               |                              |           | 0                   | Martin and Stevens (1978) <sup>3</sup> |
| [Ce <sup>III</sup> ...NO <sub>3</sub> ]*      |                   | Ce <sup>III</sup>                             | NO <sub>3</sub>              |           | 4.36E+04            | Martin and Stevens (1978) <sup>1</sup> |
|                                               |                   |                                               |                              |           | 6.76E+04            | Martin and Stevens (1978) <sup>2</sup> |
|                                               |                   |                                               |                              |           | 7.74E+04            | Martin and Stevens (1978) <sup>3</sup> |
| Ce <sup>III</sup>                             | NO <sub>3</sub>   | Ce <sup>IV</sup> NO <sub>3</sub> <sup>-</sup> |                              |           | 6.00E+07 (9.96E-14) | Martin and Stevens (1978) <sup>1</sup> |
|                                               |                   |                                               |                              |           | 1.08E+06 (1.79E-15) | Martin and Stevens (1978) <sup>2</sup> |
|                                               |                   |                                               |                              |           | 1.78E+06 (2.96E-15) | Martin and Stevens (1978) <sup>3</sup> |
| NO <sub>3</sub>                               | hν <sub>254</sub> | NO <sub>2</sub>                               | O                            |           | 1.20E-19            | Sander (1986)                          |
| NO <sub>3</sub>                               | hν <sub>313</sub> | NO <sub>2</sub>                               | O                            |           | N/A                 | N/A                                    |
| NO <sub>3</sub>                               | hν <sub>369</sub> | NO <sub>2</sub>                               | O                            |           | 9.56E-19            | Schott and Davidson (1958)             |
| NO <sub>3</sub>                               | hν <sub>421</sub> | NO <sub>2</sub>                               | O                            |           | 8.00E-20            | Wayne et al. (1991)                    |
| NO <sub>3</sub>                               | H <sub>2</sub> O  | H <sup>+</sup>                                | NO <sub>3</sub> <sup>-</sup> | OH        | 5.30E+05 (8.80E-16) | Jiang et al. (1992)                    |
| NO <sub>3</sub>                               | NO                | 2 NO <sub>2</sub>                             |                              |           | (1.57E+10) 2.6E-11  | Atkinson et al. (2004)                 |

Table S1 – continued from previous page

| Reactant 1                    | Reactant 2                    | Product 1                     | Product 2                    | Product 3        | RateCoeff           | Citation                     |
|-------------------------------|-------------------------------|-------------------------------|------------------------------|------------------|---------------------|------------------------------|
| NO <sub>3</sub>               | NO <sub>2</sub>               | N <sub>2</sub> O <sub>5</sub> |                              |                  | 1.70E+09 (2.82E-12) | Katsumura et al. (1991)      |
| NO <sub>3</sub>               | NO <sub>2</sub> <sup>-</sup>  | NO <sub>3</sub> <sup>-</sup>  | NO <sub>2</sub>              |                  | 1.2E+09 (2.0E-12)   | Daniels (1969)               |
| NO <sub>3</sub>               | NO <sub>3</sub>               | N <sub>2</sub> O <sub>6</sub> |                              |                  | 9.2E+05 (1.53E-15)  | Martin and Stevens (1978)    |
| NO <sub>3</sub>               | H                             | NO <sub>2</sub>               | OH                           |                  | (5.66E+10) 9.4E-11  | Becker et al. (1992)         |
| NO <sub>3</sub>               | O                             | NO <sub>2</sub>               | O <sub>2</sub>               |                  | (6.02E+09) 1.0E-11  | DeMore et al. (1994)         |
| NO <sub>3</sub>               | OH                            | NO <sub>2</sub>               | HO <sub>2</sub>              |                  | (1.20E+10) 2.0E-11  | Atkinson et al. (1994)       |
| NO <sub>3</sub>               | HO <sub>2</sub>               | H <sup>+</sup>                | NO <sub>3</sub> <sup>-</sup> | O <sub>2</sub>   | 3E+09 (4.98E-12)    | Jiang et al. (1992)          |
| NO <sub>3</sub>               | H <sub>2</sub> O <sub>2</sub> | H <sup>+</sup>                | NO <sub>3</sub> <sup>-</sup> | HO <sub>2</sub>  | 7.1E+06 (1.7E-14)   | Herrmann et al. (1994)       |
| NO <sub>3</sub>               | HNO <sub>2</sub>              | H <sup>+</sup>                | NO <sub>3</sub> <sup>-</sup> | NO <sub>2</sub>  | 8.0E+06 (1.3E-14)   | Katsumura et al. (1991)      |
| NO <sub>2</sub>               | hν <sub>254</sub>             | NO                            | O                            |                  | 1.1E-20             | Sander et al. (2011)         |
| NO <sub>2</sub>               | hν <sub>313</sub>             | NO                            | O                            |                  | 2.2E-19             | Sander et al. (2011)         |
| NO <sub>2</sub>               | hν <sub>369</sub>             | NO                            | O                            |                  | 5.6E-19             | Sander et al. (2011)         |
| NO <sub>2</sub>               | NO                            | N <sub>2</sub> O <sub>3</sub> |                              |                  | 1.1E+09 (1.8E-12)   | Grätzel et al. (1970)        |
| NO <sub>2</sub>               | NO <sub>2</sub>               | N <sub>2</sub> O <sub>4</sub> |                              |                  | 4.7E+08 (7.8E-13)   | Poskrebyshev et al. (2001)   |
| NO <sub>2</sub>               | O                             | NO                            | O <sub>2</sub>               |                  | (6.02E+09) 1.0E-11  | Atkinson et al. (2004)       |
| NO <sub>2</sub>               | O                             | NO <sub>3</sub>               |                              |                  | (1.39E+10) 2.3E-11  | Atkinson et al. (2004)       |
| NO <sub>2</sub>               | H                             | HNO <sub>2</sub>              |                              |                  | 1E+10 (1.7E-11)     | Loeager and Sehested (1993)  |
| NO <sub>2</sub>               | OH                            | H <sup>+</sup>                | NO <sub>3</sub> <sup>-</sup> |                  | 4.5E+09 (2.0E-11)   | Loeager and Sehested (1993)  |
| NO <sub>2</sub>               | HO <sub>2</sub>               | HNO <sub>4</sub>              |                              |                  | 1.8E+09 (3.0E-12)   | Loeager and Sehested (1993)  |
| NO                            | O                             | NO <sub>2</sub>               |                              |                  | (1.81E+10) 3.0E-11  | Atkinson et al. (2004)       |
| NO                            | OH                            | HNO <sub>2</sub>              |                              |                  | 2E+10 (3.3E-11)     | Strehlow and Wagner (1982)   |
| NO                            | HO <sub>2</sub>               | H <sup>+</sup>                | NO <sub>3</sub> <sup>-</sup> |                  | 3.2E+09 (5.3E-12)   | Goldstein and Czapski (1995) |
| N <sub>2</sub> O <sub>3</sub> | hν <sub>313</sub>             | NO                            | NO <sub>2</sub>              |                  | 9.4E-19             | Stockwell and Calvert (1978) |
| N <sub>2</sub> O <sub>3</sub> | hν <sub>369</sub>             | NO                            | NO <sub>2</sub>              |                  | 2.7E-19             | Stockwell and Calvert (1978) |
| N <sub>2</sub> O <sub>3</sub> |                               | NO                            | NO <sub>2</sub>              |                  | 3.6E+08             | Atkinson et al. (2004)       |
| N <sub>2</sub> O <sub>3</sub> | H <sub>2</sub> O              | 2 HNO <sub>2</sub>            |                              |                  | 2.0E+08 (3.3E-13)   | Park and Lee (1988)          |
| N <sub>2</sub> O <sub>4</sub> | hν <sub>254</sub>             | 2 NO <sub>2</sub>             |                              |                  | 6.5E-19             | Sander et al. (2011)         |
| N <sub>2</sub> O <sub>4</sub> | hν <sub>313</sub>             | 2 NO <sub>2</sub>             |                              |                  | 2.5E-19             | Sander et al. (2011)         |
| N <sub>2</sub> O <sub>4</sub> | hν <sub>369</sub>             | 2 NO <sub>2</sub>             |                              |                  | 1.3E-19             | Sander et al. (2011)         |
| N <sub>2</sub> O <sub>4</sub> |                               | 2 NO <sub>2</sub>             |                              |                  | 6800                | Poskrebyshev et al. (2001)   |
| N <sub>2</sub> O <sub>4</sub> | H <sub>2</sub> O              | H <sup>+</sup>                | NO <sub>3</sub> <sup>-</sup> | HNO <sub>2</sub> | 1.5E+08 (2.49E-13)  | Park and Lee (1988)          |
| N <sub>2</sub> O <sub>5</sub> | hν <sub>254</sub>             | NO <sub>2</sub>               | NO <sub>3</sub>              |                  | 3.2E-19             | Sander et al. (2011)         |
| N <sub>2</sub> O <sub>5</sub> | hν <sub>313</sub>             | NO <sub>2</sub>               | NO <sub>3</sub>              |                  | 1.6E-20             | Sander et al. (2011)         |

Table S1 – continued from previous page

| Reactant 1                    | Reactant 2                    | Product 1                     | Product 2                      | Product 3 | RateCoeff           | Citation                     |
|-------------------------------|-------------------------------|-------------------------------|--------------------------------|-----------|---------------------|------------------------------|
| N <sub>2</sub> O <sub>5</sub> | hν <sub>369</sub>             | NO <sub>2</sub>               | NO <sub>3</sub>                |           | 7.2E-22             | Sander et al. (2011)         |
| N <sub>2</sub> O <sub>5</sub> | hν <sub>421</sub>             | NO <sub>2</sub>               | NO <sub>3</sub>                |           | 8.0E-23             | Sander et al. (2011)         |
| N <sub>2</sub> O <sub>5</sub> |                               | NO <sub>2</sub>               | NO <sub>3</sub>                |           | 0.06                | Atkinson et al. (2004)       |
| N <sub>2</sub> O <sub>5</sub> | H <sub>2</sub> O              | 2 H <sup>+</sup>              | 2 NO <sub>3</sub> <sup>-</sup> |           | (7.8) 1.3E-20       | Morris and Niki (1973)       |
| HNO <sub>2</sub>              | hν <sub>254</sub>             | NO                            | OH                             |           | 1.4E-19             | Sander et al. (2011)         |
| HNO <sub>2</sub>              | hν <sub>313</sub>             | NO                            | OH                             |           | 2.2E-20             | Sander et al. (2011)         |
| HNO <sub>2</sub>              | hν <sub>369</sub>             | NO                            | OH                             |           | 3.1E-19             | Sander et al. (2011)         |
| HNO <sub>2</sub>              | hν <sub>421</sub>             | NO                            | OH                             |           | 2.4E-21             | Sander et al. (2011)         |
| HNO <sub>2</sub>              | H                             | NO                            | H <sub>2</sub> O               |           | 4.5E+08 (7.5E-13)   | Halpern and Rabani (1966)    |
| HNO <sub>2</sub>              | OH                            | NO <sub>2</sub>               | H <sub>2</sub> O               |           | (3.61E+09) 6.0E-12  | Atkinson et al. (2004)       |
| HNO <sub>3</sub>              | hν <sub>254</sub>             | NO <sub>2</sub>               | OH                             |           | 2.0E-20             | Sander et al. (2011)         |
| HNO <sub>3</sub>              | hν <sub>313</sub>             | NO <sub>2</sub>               | OH                             |           | 6.3E-22             | Sander et al. (2011)         |
| HNO <sub>3</sub>              | hν <sub>369</sub>             | NO <sub>2</sub>               | OH                             |           | 4.2E-24             | Sander et al. (2011)         |
| HNO <sub>3</sub>              | OH                            | NO <sub>3</sub>               | H <sub>2</sub> O               |           | 5.3E+07 (8.8E-14)   | Jiang et al. (1992)          |
| HNO <sub>4</sub>              | hν <sub>254</sub>             | NO <sub>2</sub>               | HO <sub>2</sub>                |           | 3.5E-19             | Sander et al. (2011)         |
| HNO <sub>4</sub>              | hν <sub>313</sub>             | NO <sub>2</sub>               | HO <sub>2</sub>                |           | 4.7E-21             | Sander et al. (2011)         |
| HNO <sub>4</sub>              | hν <sub>369</sub>             | NO <sub>2</sub>               | HO <sub>2</sub>                |           | 1.7E-22             | Sander et al. (2011)         |
| HNO <sub>4</sub>              |                               | NO <sub>2</sub>               | HO <sub>2</sub>                |           | 4.6E-03             | Lammel et al. (1990)         |
| HNO <sub>4</sub>              |                               | HNO <sub>2</sub>              | O <sub>2</sub>                 |           | 7E-04               | Loegager and Sehested (1993) |
| HNO <sub>4</sub>              | OH                            |                               |                                |           | (2.83E+09) 4.70E-12 | Atkinson et al. (2004)       |
| H                             | O <sub>2</sub>                | HO <sub>2</sub>               |                                |           | 1.0E+10 (1.7E-11)   | Elliot et al. (1990)         |
| H                             | O <sub>2</sub>                | H <sub>2</sub> O <sub>2</sub> |                                |           | 2.0E+10 (3.3E-11)   | Feng et al. (1970)           |
| OH                            | O                             | O <sub>2</sub>                | H                              |           | (2.0E+10) 3.3E-11   | DeMore et al. (1997)         |
| OH                            | OH                            | H <sub>2</sub> O <sub>2</sub> |                                |           | 4.2E+09 (7.0E-12)   | Elliot et al. (1990)         |
| OH                            | HO <sub>2</sub>               | O <sub>2</sub>                | H <sub>2</sub> O               |           | 1.0E+10 (1.7E-11)   | Elliot and Buxton (1992)     |
| OH                            | HO <sub>2</sub>               | H <sub>2</sub> O <sub>3</sub> |                                |           | (2.14E+09) 3.55E-12 | Badenes et al. (2017)        |
| OH                            | H <sub>2</sub> O <sub>2</sub> | HO <sub>2</sub>               | H <sub>2</sub> O               |           | (1.0E+09) 1.7E-12   | Atkinson et al. (2004)       |
| H <sub>2</sub> O <sub>2</sub> | hν <sub>254</sub>             | 2OH                           |                                |           | 6.7E-20             | Sander et al. (2011)         |
| H <sub>2</sub> O <sub>2</sub> | hν <sub>313</sub>             | 2OH                           |                                |           | 3.4E-21             | Sander et al. (2011)         |
| H <sub>2</sub> O <sub>2</sub> | hν <sub>369</sub>             | 2OH                           |                                |           | 7.2E-23             | Kahan et al. (2012)          |
| H <sub>2</sub> O <sub>2</sub> | hν <sub>421</sub>             | 2OH                           |                                |           | 9.2E-24             | Kahan et al. (2012)          |
| H <sub>2</sub> O <sub>2</sub> | H                             | H <sub>2</sub> O              | OH                             |           | 3.6E+07 (6.0E-14)   | Mezyk and Bartels (1995)     |



**Table S1 – continued from previous page**

| <b>Reactant 1</b>             | <b>Reactant 2</b> | <b>Product 1</b> | <b>Product 2</b> | <b>Product 3</b> | <b>RateCoeff</b>  | <b>Citation</b>           |
|-------------------------------|-------------------|------------------|------------------|------------------|-------------------|---------------------------|
| H <sub>2</sub> O <sub>2</sub> | O                 | HO <sub>2</sub>  | OH               |                  | 1.6E+09 (2.7E-12) | Sauer et al. (1984)       |
| NO <sub>3</sub> <sup>-</sup>  | H                 | H <sub>2</sub> O | NO <sub>2</sub>  |                  | 1.0E+07 (1.7E-14) | Jiang et al. (1992)       |
| NO <sub>3</sub> <sup>-</sup>  | H <sup>+</sup>    | HNO <sub>3</sub> |                  |                  | 6.0E+08 (1.0E-12) | Poskrebyshv et al. (2001) |

**Table S2.** VOC tracers used in CAN/HNO<sub>3</sub> and CAN/NaNO<sub>3</sub> irradiation studies. Bimolecular rate coefficients for reaction with NO<sub>3</sub> are given in units of cm<sup>3</sup> molecule<sup>-1</sup> s<sup>-1</sup>.

| Compound                | Formula                                       | Structure                                                                           | Mixing Ratio (ppb) | k <sub>NO<sub>3</sub></sub> | References               |
|-------------------------|-----------------------------------------------|-------------------------------------------------------------------------------------|--------------------|-----------------------------|--------------------------|
| Acetonitrile            | C <sub>2</sub> H <sub>3</sub> N               | 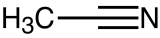   | 517                | <3.01 × 10 <sup>-19</sup>   | Cantrell et al. (1987)   |
| Butanal                 | C <sub>4</sub> H <sub>8</sub> O               |    | 42                 | 1.22 × 10 <sup>-14</sup>    | D'Anna et al. (2001)     |
| Thiophene               | C <sub>4</sub> H <sub>4</sub> S               |    | 48                 | 3.94 × 10 <sup>-14</sup>    | Atkinson (1991)          |
| 2,3-Dihydrobenzofuran   | C <sub>8</sub> H <sub>8</sub> O               |    | 34                 | 1.15 × 10 <sup>-13</sup>    | Atkinson (1991)          |
| cis-3-Hexenyl-1-Acetate | C <sub>8</sub> H <sub>14</sub> O <sub>2</sub> |    | 24                 | 2.46 × 10 <sup>-13</sup>    | Atkinson et al. (1995)   |
| Isoprene                | C <sub>5</sub> H <sub>8</sub>                 |   | 38                 | 3.77 × 10 <sup>-16</sup>    | Atkinson (1991)          |
| Dimethyl Sulfide        | C <sub>2</sub> H <sub>6</sub> S               |  | 6.5                | 1.09 × 10 <sup>-12</sup>    | Atkinson et al. (2004)   |
| 2,5-Dimethylthiophene   | C <sub>6</sub> H <sub>8</sub> S               |  | 4.2                | 2.52 × 10 <sup>-12</sup>    | Cabañas et al. (2006)    |
| α-Pinene                | C <sub>10</sub> H <sub>16</sub>               |  | 3.0                | 6.16 × 10 <sup>-12</sup>    | Atkinson (1991)          |
| Guaiacol                | C <sub>7</sub> H <sub>8</sub> O <sub>2</sub>  |  | 2.1                | 2.69 × 10 <sup>-11</sup>    | Lauraguais et al. (2016) |

## References

- Atkinson, R.: Kinetics and Mechanisms of the Gas-Phase Reactions of the NO<sub>3</sub> Radical with Organic Compounds, *Journal of Physical and Chemical Reference Data*, 20, 459–507, <https://doi.org/http://dx.doi.org/10.1063/1.555887>, 1991.
- 5 Atkinson, R., Tuazon, E. C., Bridier, I., and Arey, J.: Reactions of NO<sub>3</sub>-naphthalene adducts with O<sub>2</sub> and NO<sub>2</sub>, *Int. J. Chem. Kinet.*, 26, 605–614, <https://doi.org/10.1002/kin.550260603>, 1994.
- Atkinson, R., Arey, J., Aschmann, S. M., Corchnoy, S. B., and Shu, Y.: Rate constants for the gas-phase reactions of cis-3-Hexen-1-ol, cis-3-Hexenylacetate, trans-2-Hexenal, and Linalool with OH and NO<sub>3</sub> radicals and O<sub>3</sub> at 296 ± 2 K, and OH radical formation yields from the O<sub>3</sub> reactions, *International Journal of Chemical Kinetics*, 27, 941–955, <https://doi.org/https://doi.org/10.1002/kin.550271002>, 1995.
- 10 Atkinson, R., Baulch, D. L., Cox, R. A., Crowley, J. N., Hampson, R. F., Hynes, R. G., Jenkin, M. E., Rossi, M. J., and Troe, J.: Evaluated kinetic and photochemical data for atmospheric chemistry: Volume I - gas phase reactions of O<sub>x</sub>, HO<sub>x</sub>, NO<sub>x</sub> and SO<sub>x</sub> species, *Atmospheric Chemistry and Physics*, 4, 1461–1738, <https://doi.org/10.5194/acp-4-1461-2004>, 2004.
- Badenes, M. P., Tucceri, M. E., and Cobos, C. J.: Role of the Recombination Channel in the Reaction between the HO and HO<sub>2</sub> Radicals, *J. Phys. Chem. A*, 121, 440–447, <https://doi.org/10.1021/acs.jpca.6b10427>, 2017.
- 15 Becker, E., Rahman, M. M., and Schindler, R. N.: Determination of the Rate Constants for the Gas Phase Reactions of NO<sub>3</sub> with H, OH and HO<sub>2</sub> Radicals at 298 K, *Berichte der Bunsengesellschaft für physikalische Chemie*, 96, 776–783, <https://doi.org/https://doi.org/10.1002/bbpc.19920960608>, 1992.
- Cabañas, B., Baeza, M., Martín, P., Salgado, S., Villanueva, F., Monedero, E., and Díaz De Mera, Y.: Reaction of the NO<sub>3</sub> radical with some thiophenes: Kinetic study and a correlation between rate constant and EHOMO, *International Journal of Chemical Kinetics*, 38, 570–576, <https://doi.org/https://doi.org/10.1002/kin.20187>, 2006.
- 20 Cantrell, C. A., Davidson, J. A., Shetter, R. E., Anderson, B. A., and Calvert, J. G.: Reactions of nitrate radical and nitrogen oxide (N<sub>2</sub>O<sub>5</sub>) with molecular species of possible atmospheric interest, *The Journal of Physical Chemistry*, 91, 6017–6021, <https://doi.org/10.1021/j100307a040>, 1987.
- Daniels, M.: Radiation chemistry of the aqueous nitrate system. III. Pulse electron radiolysis of concentrated sodium nitrate solutions, *J. Phys. Chem.*, 73, 3710–3717, <https://doi.org/10.1021/j100845a027>, 1969.
- 25 D'Anna, B., Andresen, Ø., Gefen, Z., and Nielsen, C. J.: Kinetic study of OH and NO<sub>3</sub> radical reactions with 14 aliphatic aldehydes, *Phys. Chem. Chem. Phys.*, 3, 3057–3063, <https://doi.org/10.1039/B103623H>, 2001.
- DeMore, W., Sander, S., Golden, D., Hampson, R., Kurylo, M., Howard, C., Ravishankara, A., Kolb, C., and Molina, M.: Chemical Kinetic and Photochemical Data for Use in Stratospheric Modeling: Evaluation No. 11 of the NASA Panel for Data Evaluation, *JPL Publication*
- 30 94-26, 1994.
- DeMore, W. B., Sander, S. P., Golden, D. M., Hampson, R. F., Kurylo, M. J., Howard, C. J., Ravishankara, A. R., Kolb, C. E., and Molina, M. J.: Chemical kinetics and photochemical data for use in stratospheric modeling. Evaluation number 12, *JPL Publication* 97-4, 1997.
- Elliot, A. J. and Buxton, G. V.: Temperature dependence of the reactions OH + O and OH + HO<sub>2</sub> in water up to 200 °C, *J. Chem. Soc., Faraday Trans.*, 88, 2465–2470, <https://doi.org/10.1039/FT9928802465>, 1992.
- 35 Elliot, A. J., McCracken, D. R., Buxton, G. V., and Wood, N. D.: Estimation of rate constants for near-diffusion-controlled reactions in water at high temperatures, *J. Chem. Soc., Faraday Trans.*, 86, 1539–1547, <https://doi.org/10.1039/FT9908601539>, 1990.
- Feng, P. Y., Brynjolfsson, A., Halliday, J. W., and Jarrett, R. D.: High-intensity radiolysis of aqueous ferrous sulfate-cupric sulfate-sulfuric acid solutions, *J. Phys. Chem.*, 74, 1221–1227, <https://doi.org/10.1021/j100701a011>, 1970.

- Goldstein, S. and Czapski, G.: The reaction of NO with  $O_2^-$  and  $HO_2^-$ : a pulse radiolysis study, *Free radical biology & medicine*, 19, 505–10, 1995.
- Grätzel, M., Taniguchi, S., and Henglein, A.: Pulsradiolytische Untersuchung kurzlebiger Zwischenprodukte der NO-Reduktion in wäßriger Lösung, *Berichte der Bunsengesellschaft für physikalische Chemie*, 74, 1003–1010, <https://doi.org/https://doi.org/10.1002/bbpc.19700741012>, 1970.
- Halpern, J. and Rabani, J.: Reactivity of Hydrogen Atoms toward Some Cobalt(III) Complexes in Aqueous Solutions1, *J. Am. Chem. Soc.*, 88, 699–704, <https://doi.org/10.1021/ja00956a015>, 1966.
- Herrmann, H., Exner, M., and Zellner, R.: Reactivity trends in reactions of the nitrate radical (NO<sub>3</sub>) with inorganic and organic cloudwater constituents, *Geochimica et Cosmochimica Acta*, 58, 3239 – 3244, [https://doi.org/https://doi.org/10.1016/0016-7037\(94\)90051-5](https://doi.org/https://doi.org/10.1016/0016-7037(94)90051-5), 1994.
- Jiang, P. Y., Katsumura, Y., Ishigure, K., and Yoshida, Y.: Reduction potential of the nitrate radical in aqueous solution, *Inorg. Chem.*, 31, 5135–5136, <https://doi.org/10.1021/ic00050a038>, 1992.
- Kahan, T. F., Washenfelder, R. A., Vaida, V., and Brown, S. S.: Cavity-Enhanced Measurements of Hydrogen Peroxide Absorption Cross Sections from 353 to 410 nm, *J. Phys. Chem. A*, 116, 5941–5947, <https://doi.org/10.1021/jp2104616>, 2012.
- Katsumura, Y., Jiang, P. Y., Nagaishi, R., Oishi, T., Ishigure, K., and Yoshida, Y.: Pulse radiolysis study of aqueous nitric acid solutions: formation mechanism, yield, and reactivity of NO<sub>3</sub> radical, *J. Phys. Chem.*, 95, 4435–4439, <https://doi.org/10.1021/j100164a050>, 1991.
- Lammel, G., Perner, D., and Warneck, P.: Decomposition of pernitric acid in aqueous solution, *J. Phys. Chem.*, 94, 6141–6144, <https://doi.org/10.1021/j100378a091>, 1990.
- Lauraguais, A., El Zein, A., Coeur, C., Obeid, E., Cassez, A., Rayez, M.-T., and Rayez, J.-C.: Kinetic Study of the Gas-Phase Reactions of Nitrate Radicals with Methoxyphenol Compounds: Experimental and Theoretical Approaches, *J. Phys. Chem. A*, 120, 2691–2699, <https://doi.org/10.1021/acs.jpca.6b02729>, 2016.
- Loegager, T. and Sehested, K.: Formation and decay of peroxyxynitrous acid: a pulse radiolysis study, *J. Phys. Chem.*, 97, 6664–6669, <https://doi.org/10.1021/j100127a016>, 1993.
- Martin, T. W. and Stevens, M. V.: Studies Using a Combination of Flash Photolysis and Pulsed Magnetic Induction: Application to the NO<sub>3</sub> Radical in Aqueous Acid Solution at 25°C, in: 12th Informal Conference on Photochemistry, National Bureau of Standards Special Publication 526, 1978.
- Mezyk, S. P. and Bartels, D. M.: Direct EPR measurement of Arrhenius parameters for the reactions of H· atoms with H<sub>2</sub>O<sub>2</sub> and D· atoms with D<sub>2</sub>O<sub>2</sub> in aqueous solution, *J. Chem. Soc., Faraday Trans.*, 91, 3127–3132, <https://doi.org/10.1039/FT9959103127>, 1995.
- Morris, E. D. J. and Niki, H.: Reaction of dinitrogen pentoxide with water, *J. Phys. Chem.*, 77, 1929–1932, <https://doi.org/10.1021/j100635a001>, 1973.
- Park, J. Y. and Lee, Y. N.: Solubility and decomposition kinetics of nitrous acid in aqueous solution, *J. Phys. Chem.*, 92, 6294–6302, <https://doi.org/10.1021/j100333a025>, 1988.
- Poskrebyshev, G. A., Neta, P., and Huie, R. E.: Equilibrium constant of the reaction  $\cdot OH + HNO_3 \rightleftharpoons H_2O + NO_3$ . in aqueous solution, *Journal of Geophysical Research: Atmospheres*, 106, 4995–5004, <https://doi.org/https://doi.org/10.1029/2000JD900702>, 2001.
- Sander, S., Abbatt, J. P. D., Barker, J. R., Burkholder, J. B., Friedl, R. R., Golden, D. M., Huie, R. E., Kolb, C. E., Kurylo, M. J., Moortgat, G. K., Orkin, V. L., and Wine, P. H.: Chemical Kinetics and Photochemical Data for Use in Atmospheric Studies, Evaluation Number 17, JPL Publication 10-6, 2011.
- Sander, S. P.: Temperature dependence of the nitrogen trioxide absorption spectrum, *J. Phys. Chem.*, 90, 4135–4142, 1986.

- Sauer, M. C. J., Brown, W. G., and Hart, E. J.: Oxygen(3P) atom formation by the photolysis of hydrogen peroxide in alkaline aqueous solutions, *J. Phys. Chem.*, 88, 1398–1400, <https://doi.org/10.1021/j150651a033>, 1984.
- Schott, G. and Davidson, N.: Shock Waves in Chemical Kinetics: The Decomposition of N<sub>2</sub>O<sub>5</sub> at High Temperatures<sup>1</sup>, *J. Am. Chem. Soc.*, 80, 1841–1853, <https://doi.org/10.1021/ja01541a019>, 1958.
- 80 Stockwell, W. R. and Calvert, J. G.: The near ultraviolet absorption spectrum of gaseous HONO and N<sub>2</sub>O<sub>3</sub>, *Journal of Photochemistry*, 8, 193–203, [https://doi.org/https://doi.org/10.1016/0047-2670\(78\)80019-7](https://doi.org/https://doi.org/10.1016/0047-2670(78)80019-7), 1978.
- Strehlow, H. and Wagner, I.: Flash Photolysis in Aqueous Nitrite Solutions, *Zeitschrift für Physikalische Chemie*, 132, 151–160, <https://doi.org/doi:10.1524/zpch.1982.132.2.151>, 1982.
- Wayne, R., Barnes, I., Biggs, P., Burrows, J., Canosa-Mas, C., Hjorth, J., Le Bras, G., Moortgat, G., Perner, D., Poulet, G., Restelli, G.,  
85 and Sidebottom, H.: The nitrate radical: Physics, chemistry, and the atmosphere, *Atmospheric Environment. Part A. General Topics*, 25, 1–203, [https://doi.org/https://doi.org/10.1016/0960-1686\(91\)90192-A](https://doi.org/https://doi.org/10.1016/0960-1686(91)90192-A), the nitrate radical: Physics, Chemistry, and the Atmosphere, 1991.
